# Supplementary material for: Structural Analysis of a Heteropolysaccharide from Saccharina japonica by Electrospray Mass Spectrometry in Tandem with Collision-Induced Dissociation Tandem Mass Spectrometry (ESI-CID-MS/MS)
Source: Mar Drugs. 2012 Sep 25;10(10):2138–52. doi: 10.3390/md10102138 (PMC3497013; doi:10.3390/md10102138)

# Supporting Information

## Table of Contents

|                                                                                            |    |
|--------------------------------------------------------------------------------------------|----|
| <b>Figure S1.</b> Gel filtration chromatography of <b>YD</b> on a Sephadex-G10 Gel column. | 2  |
| <b>Figure S2.</b> Gel filtration chromatography of <b>YT</b> on a Sephadex-G10 Gel column. | 3  |
| <b>Figure S3.</b> $^1\text{H}$ -NMR of <b>G2</b> .                                         | 4  |
| <b>Figure S4.</b> DEPTQ (C-NMR) of <b>G2</b> .                                             | 5  |
| <b>Figure S5.</b> HMBC spectrum of <b>G2</b> .                                             | 6  |
| <b>Figure S6.</b> 2D HSQC spectrum of <b>G2</b> .                                          | 7  |
| <b>Figure S7.</b> 2D TOCSY of <b>G2</b> .                                                  | 8  |
| <b>Figure S8.</b> $^1\text{H}$ -NMR of <b>G3</b> .                                         | 9  |
| <b>Figure S9.</b> DEPTQ (C-NMR) of <b>G3</b> .                                             | 10 |
| <b>Figure S10.</b> $^1\text{H}$ -NMR of <b>G3</b> .                                        | 11 |
| <b>Figure S11.</b> DEPTQ (C-NMR) of <b>G3</b> .                                            | 12 |
| <b>Figure S12.</b> $^1\text{H}$ -NMR of <b>YT</b> .                                        | 13 |
| <b>Figure S13.</b> DEPTQ (C-NMR) of <b>YT</b> .                                            | 14 |

**Figure S1.** Gel filtration chromatography of **YD** on a Sephadex-G10 Gel column.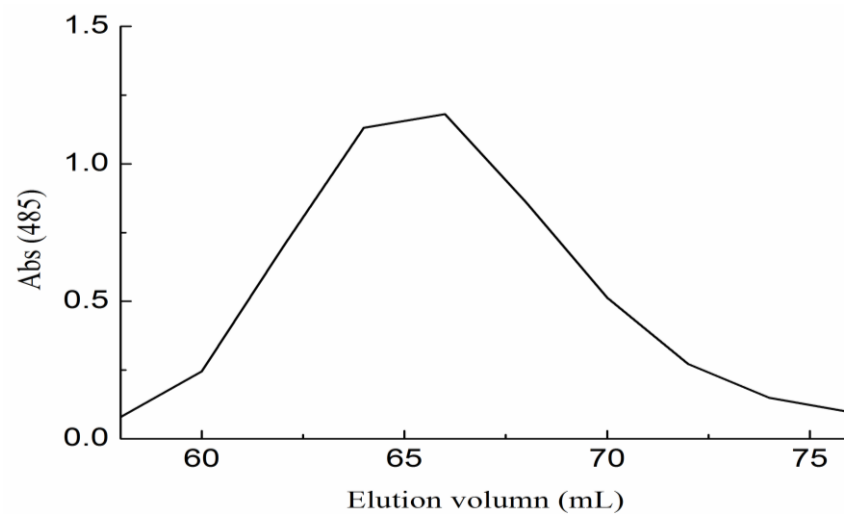**Figure S2.** Gel filtration chromatography of **YT** on a Sephadex-G10 Gel column.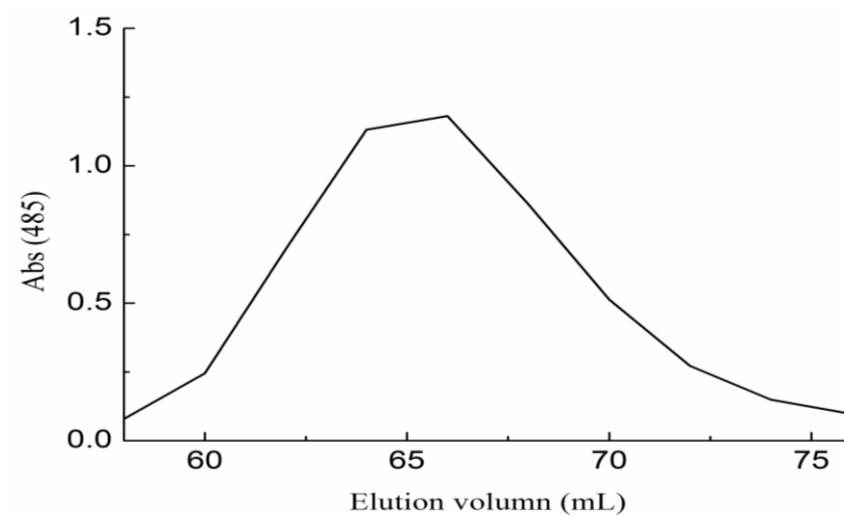

**Figure S3.**  $^1\text{H}$ -NMR of G2.

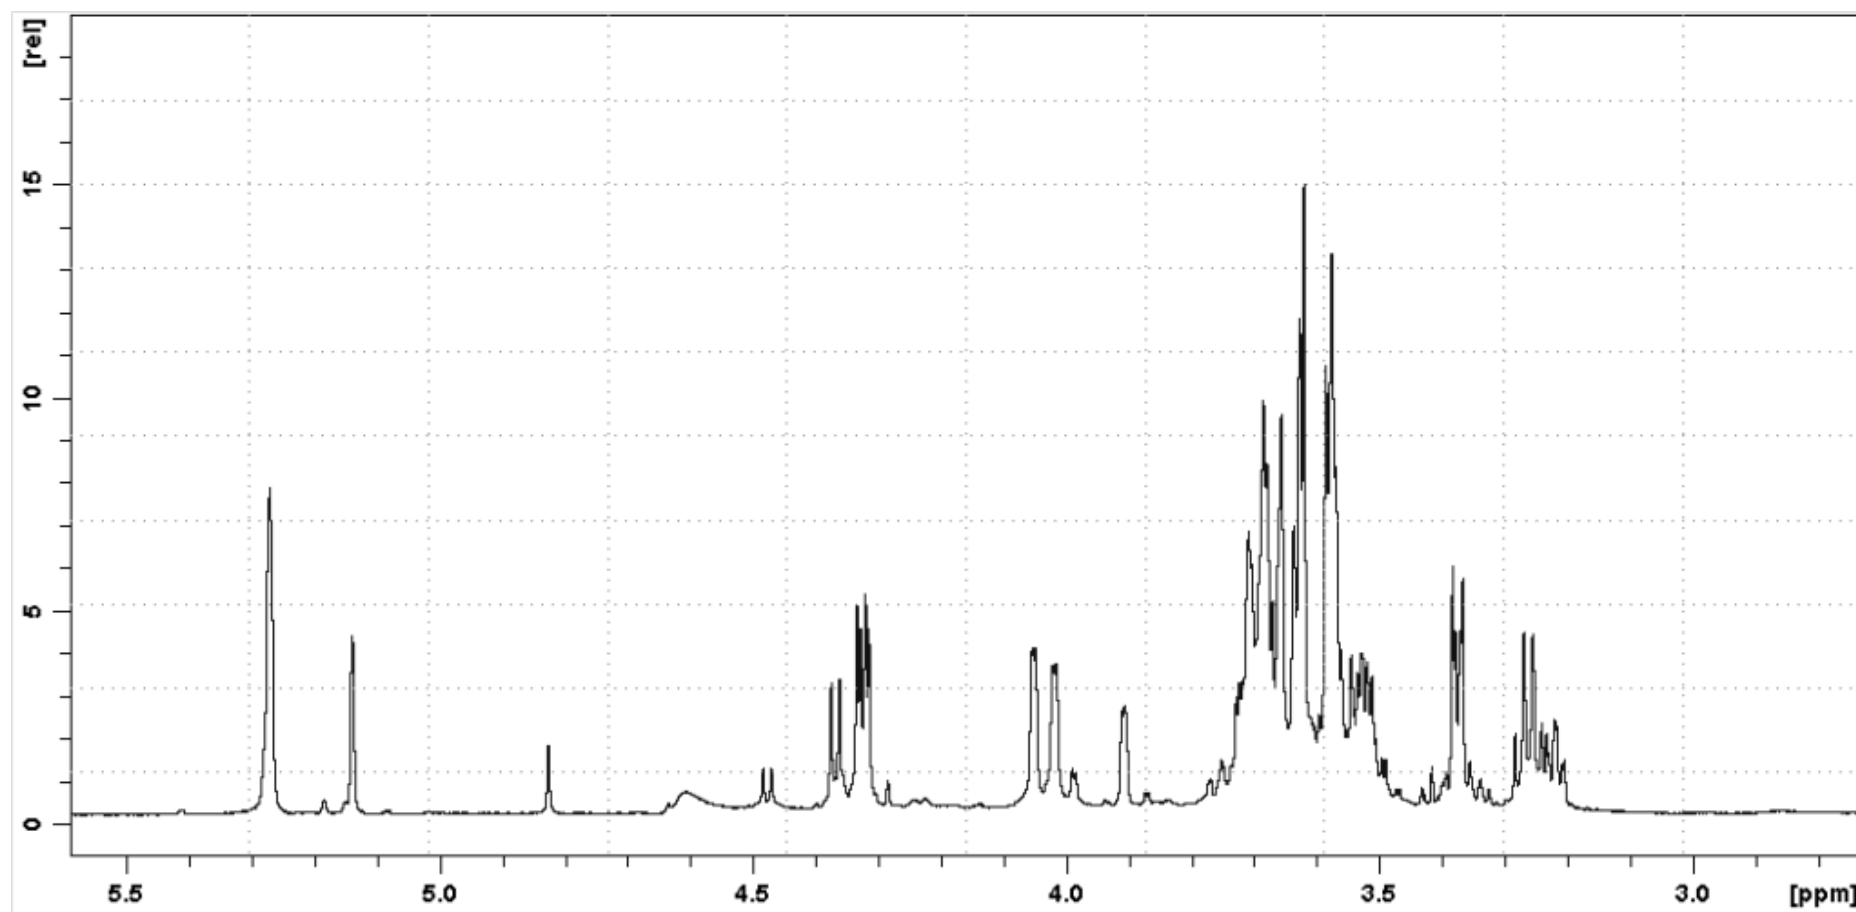

**Figure S4.** DEPTQ (C-NMR) of G2.

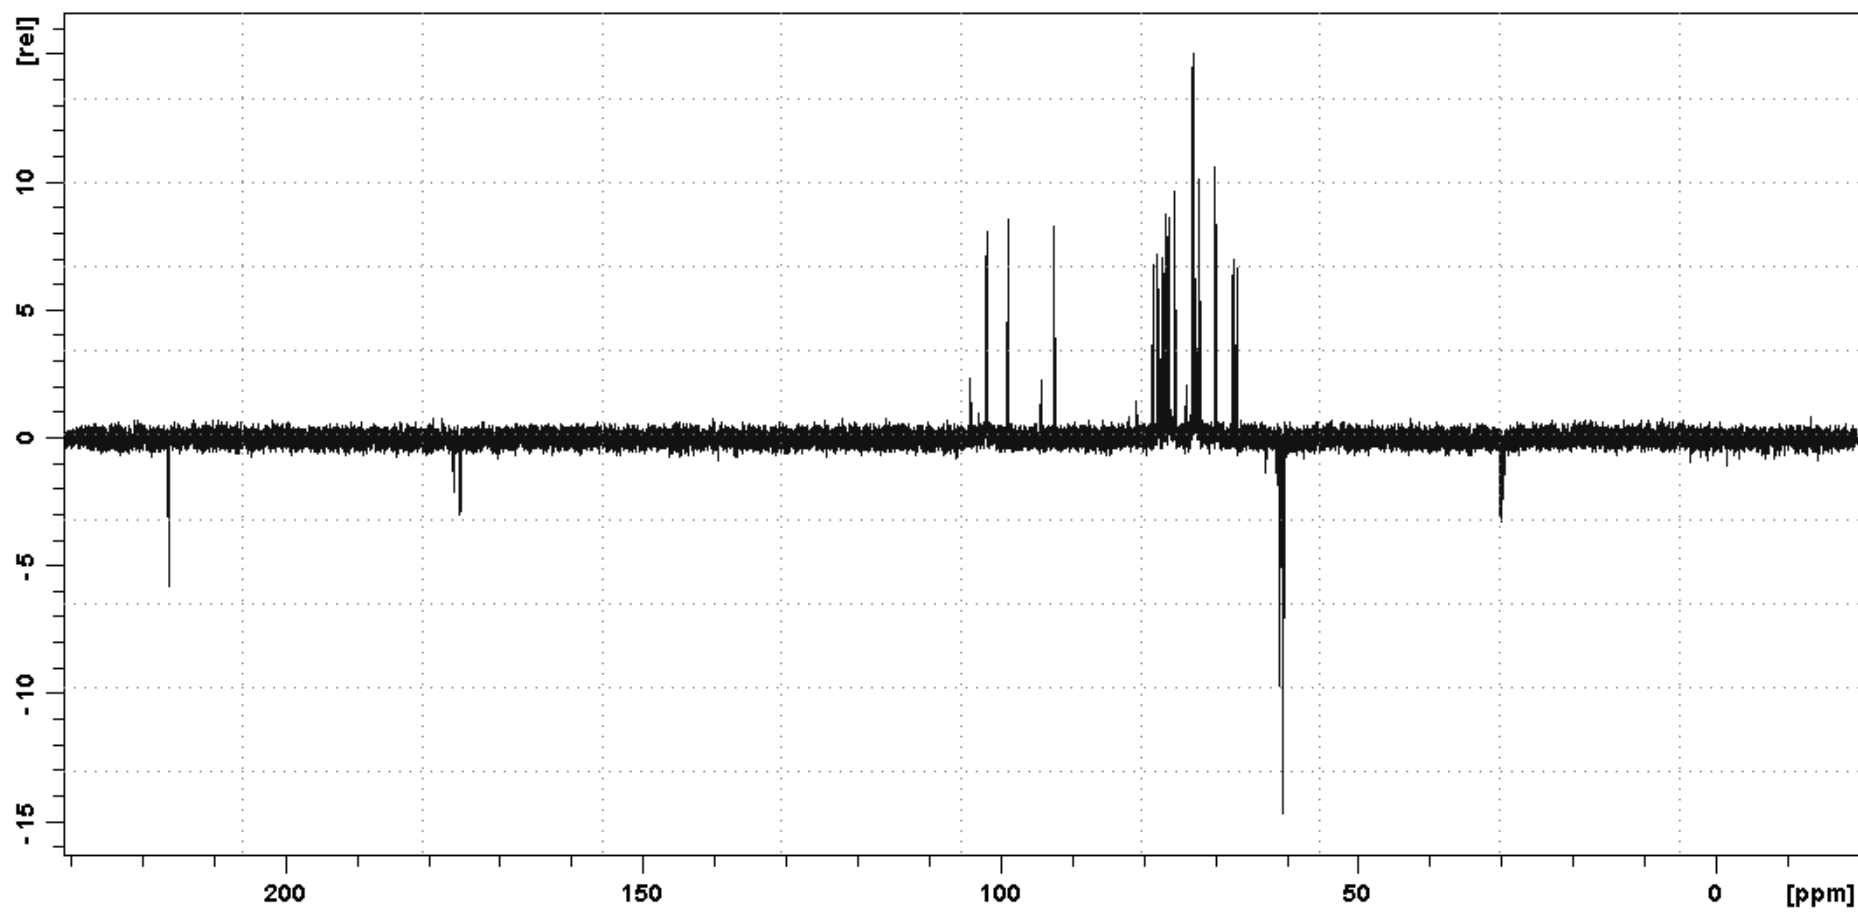

Figure S5. HMBC spectrum of G2.

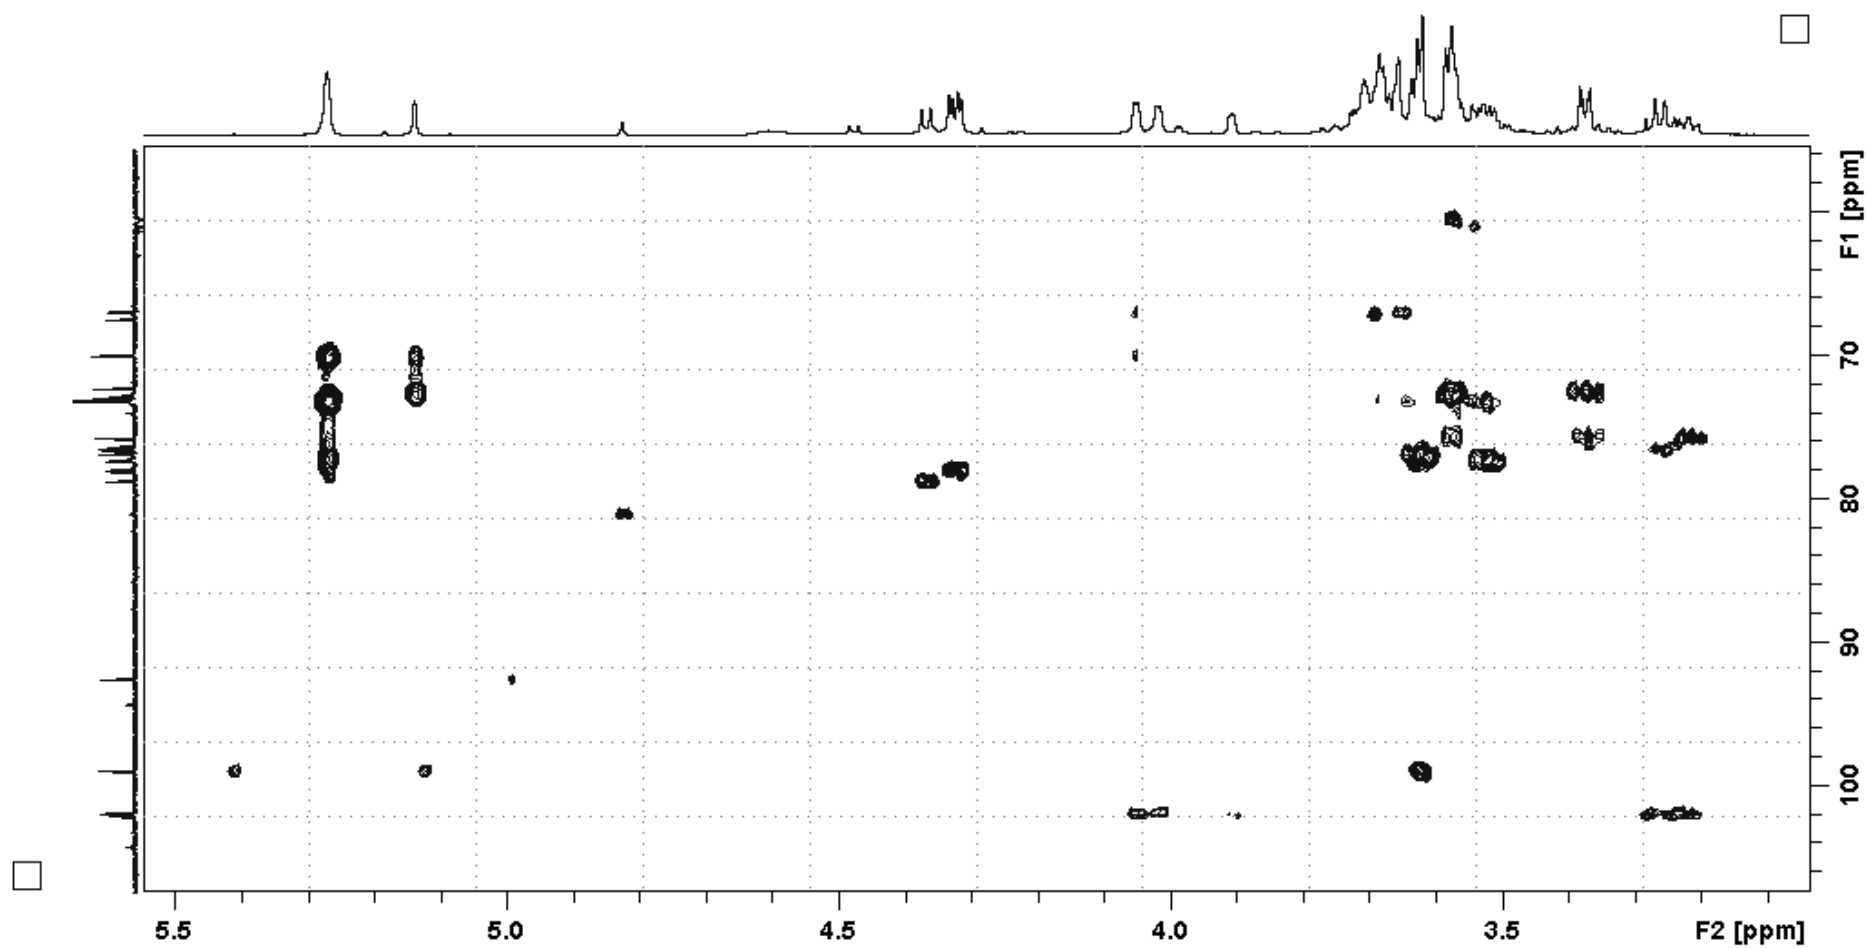

**Figure S6.** 2D HSQC spectrum of G2.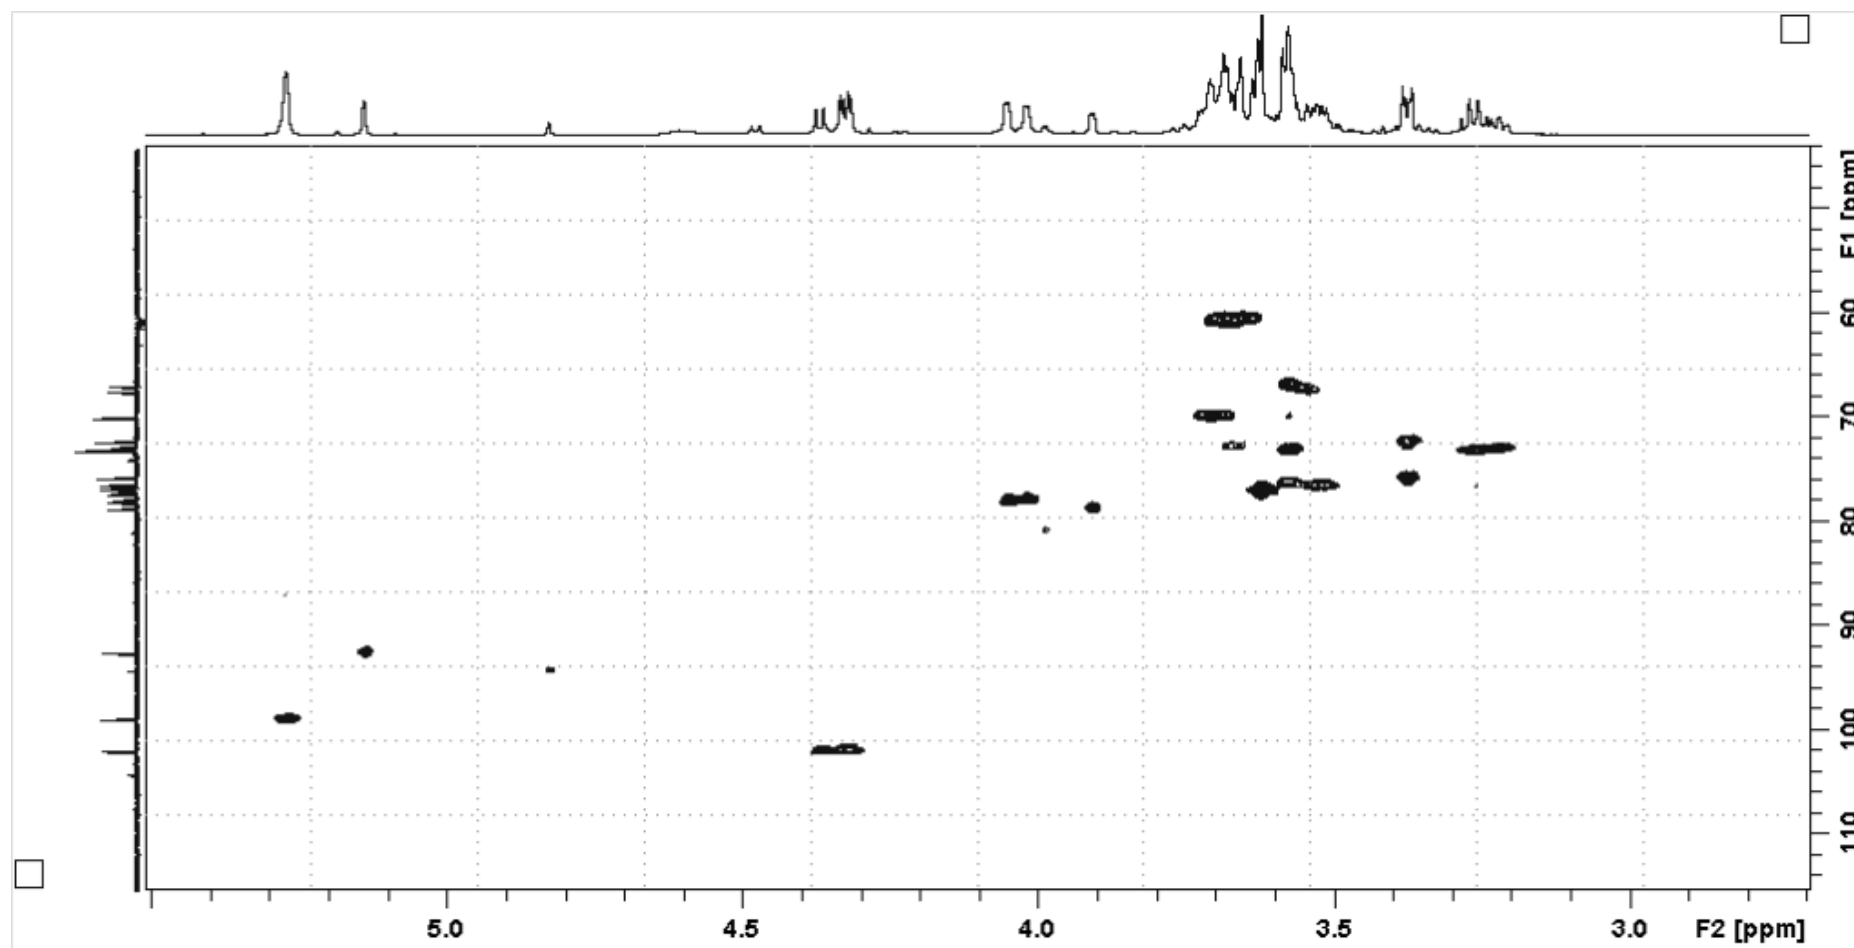

Figure S7. 2D TOCSY of G2.

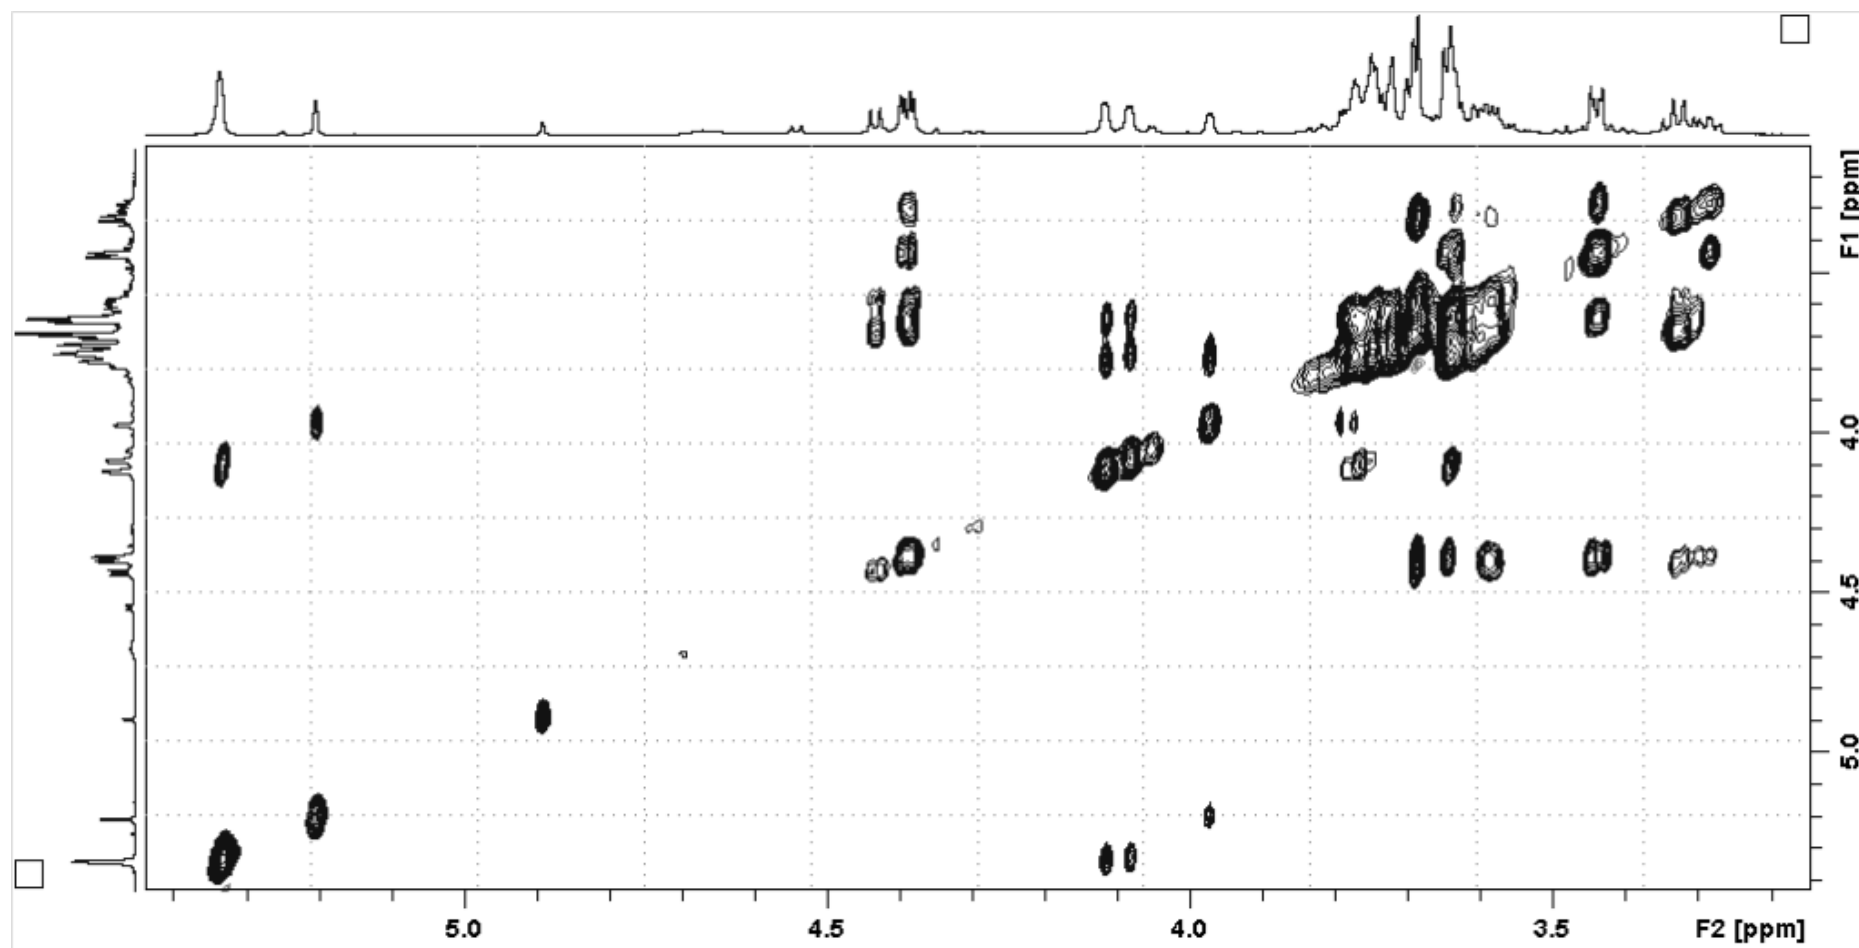

Figure S8.  $^1\text{H}$ -NMR of G3.

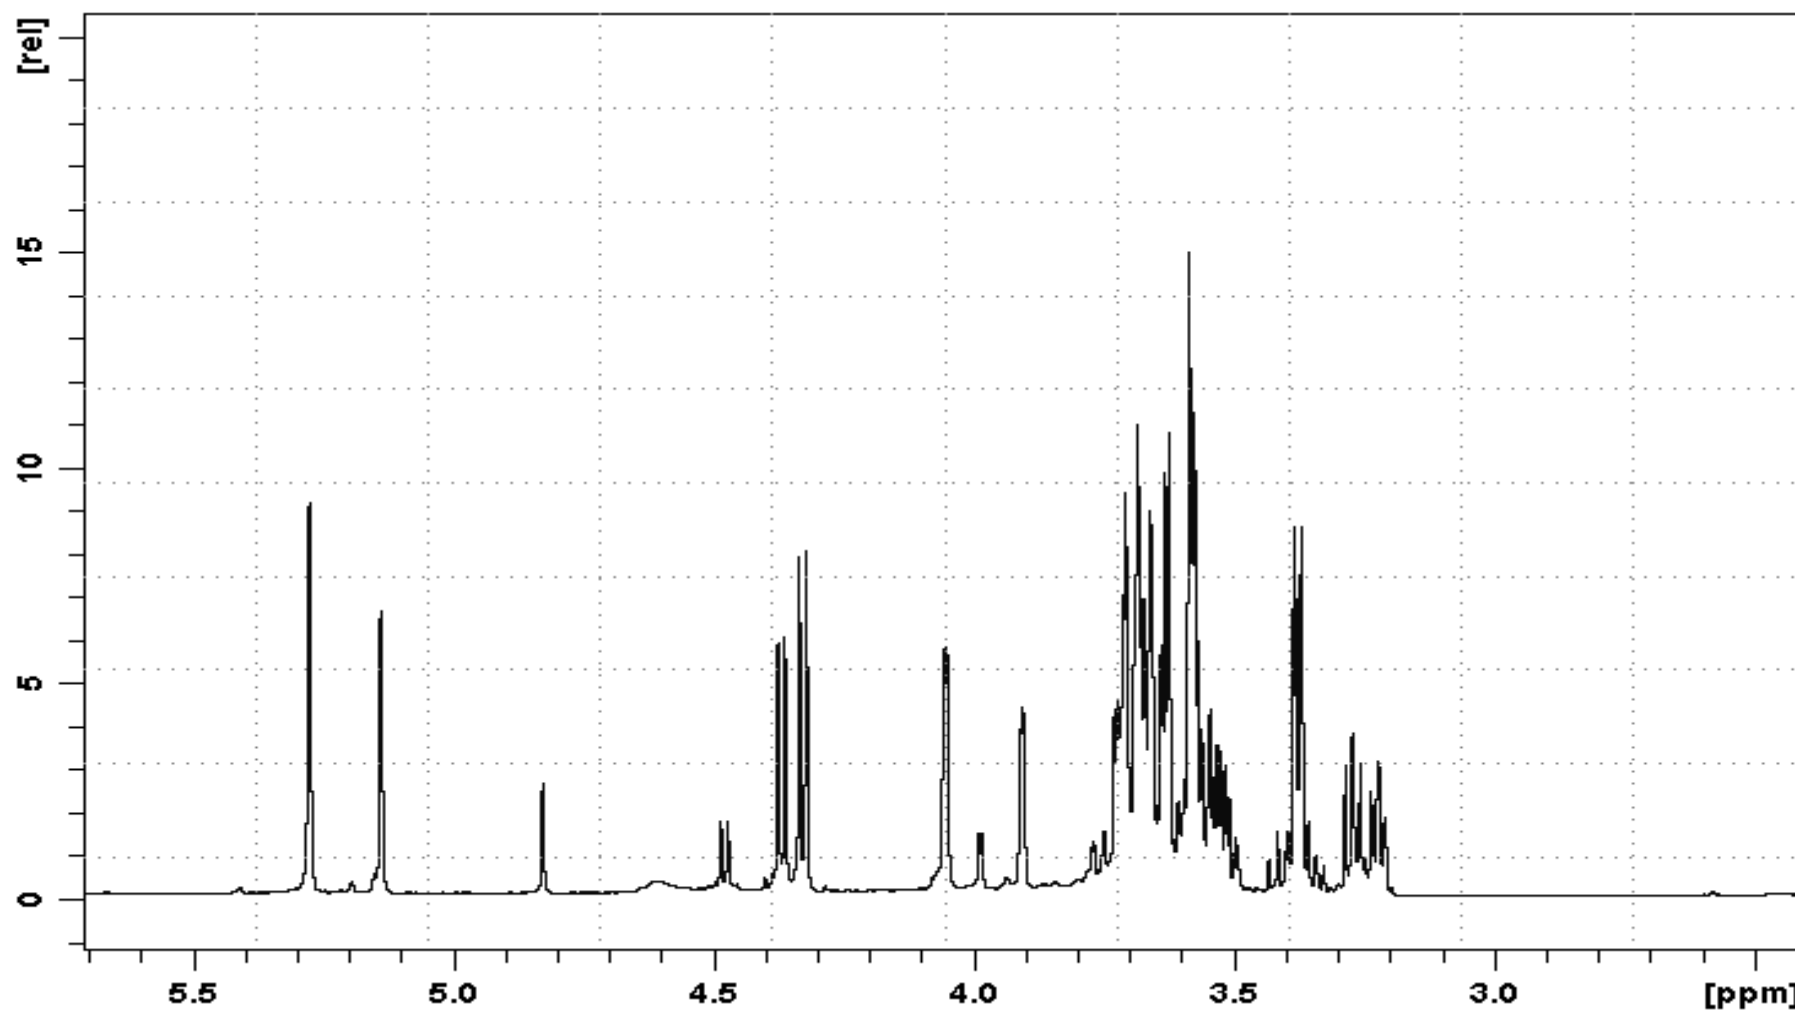

**Figure S9.** DEPTQ (C-NMR) of G3.

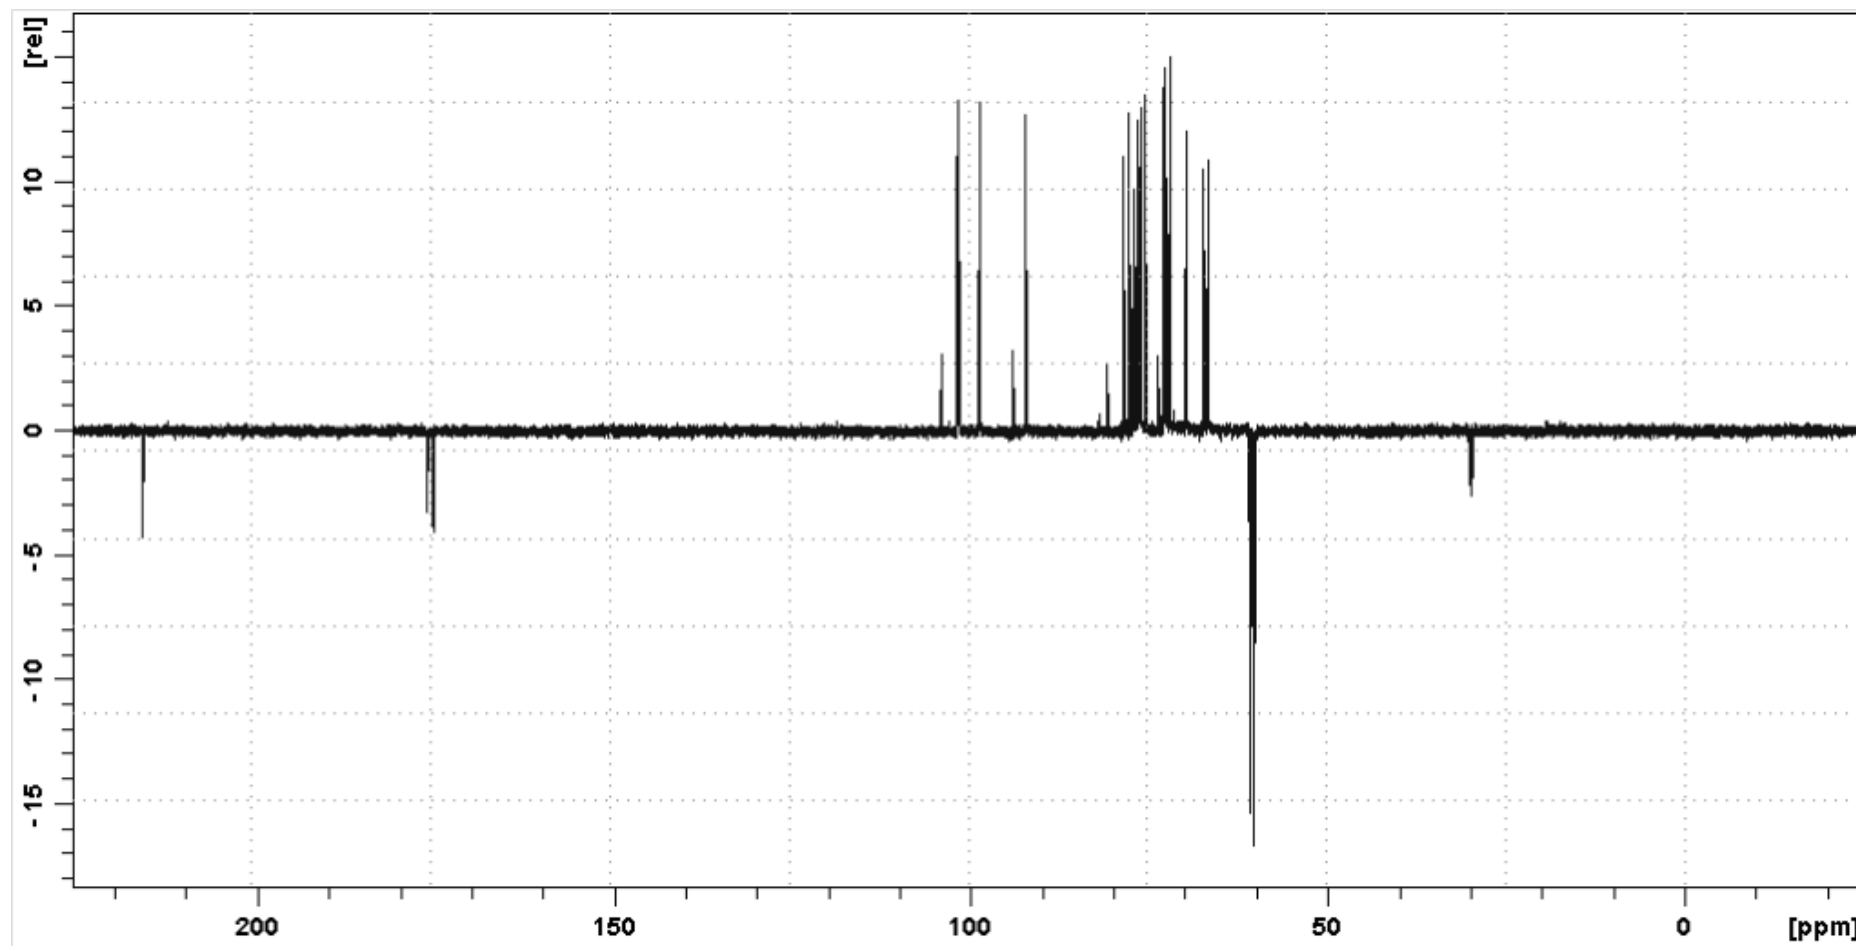

**Figure S10.**  $^1\text{H}$ -NMR of G3.

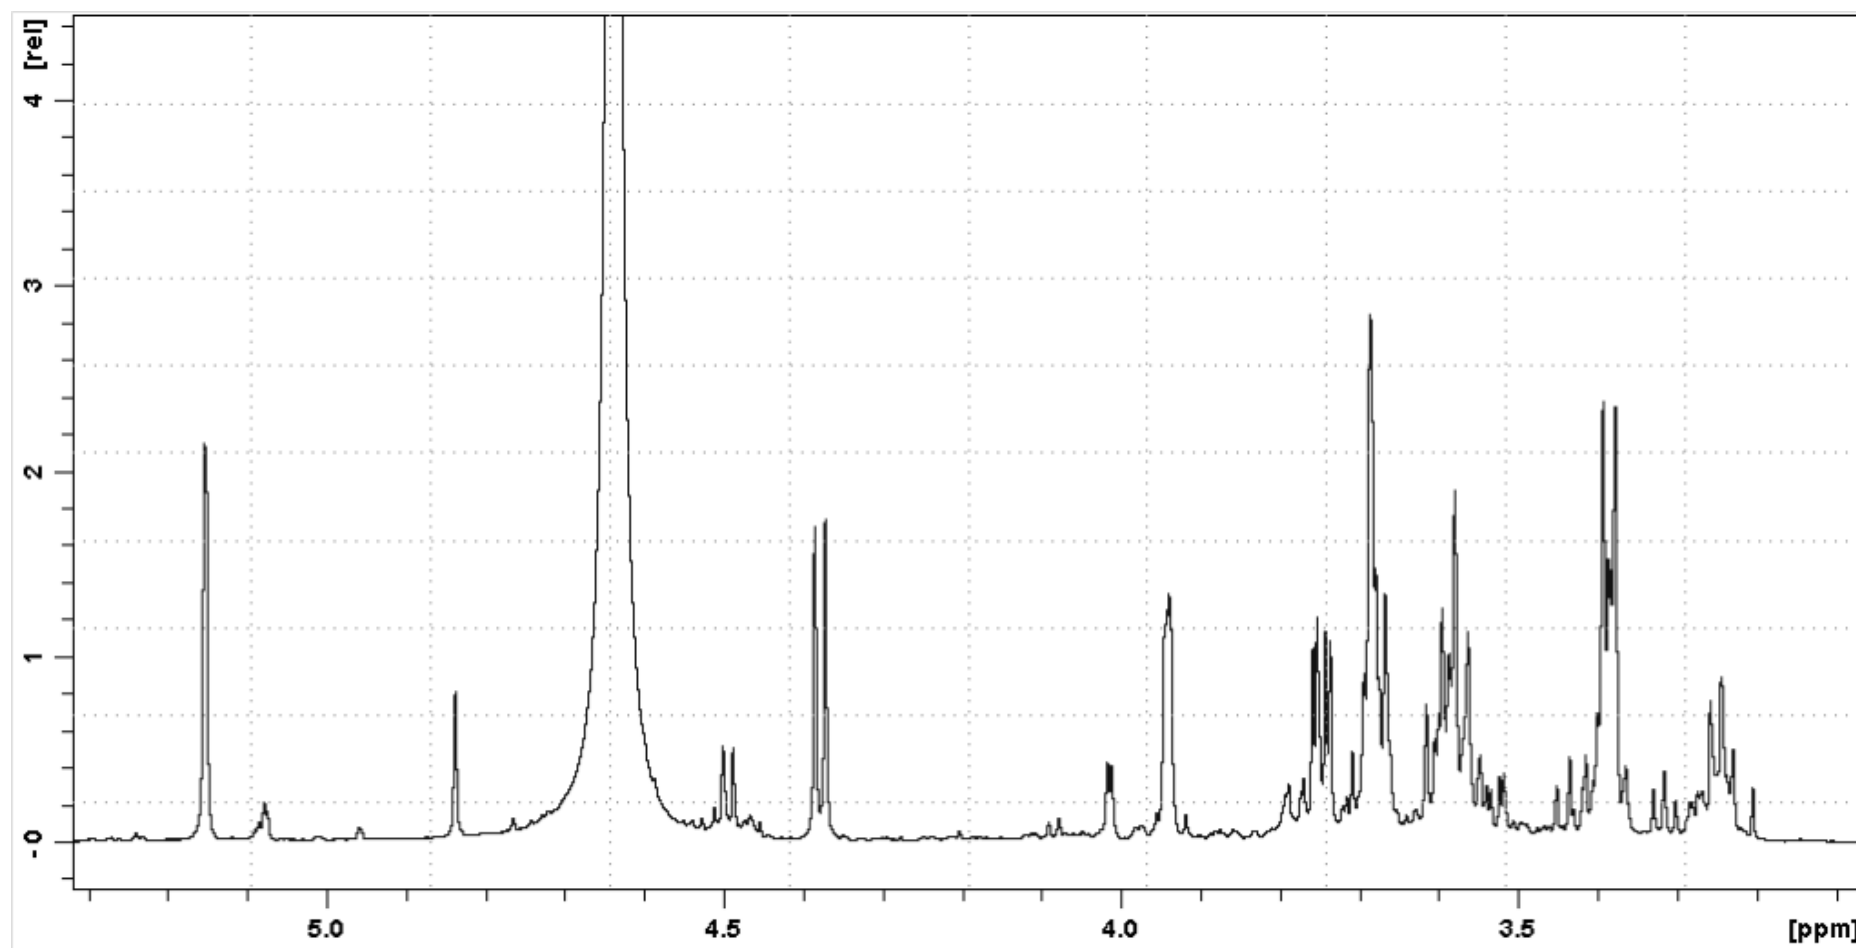

**Figure S11.** DEPTQ (C-NMR) of **G3**.

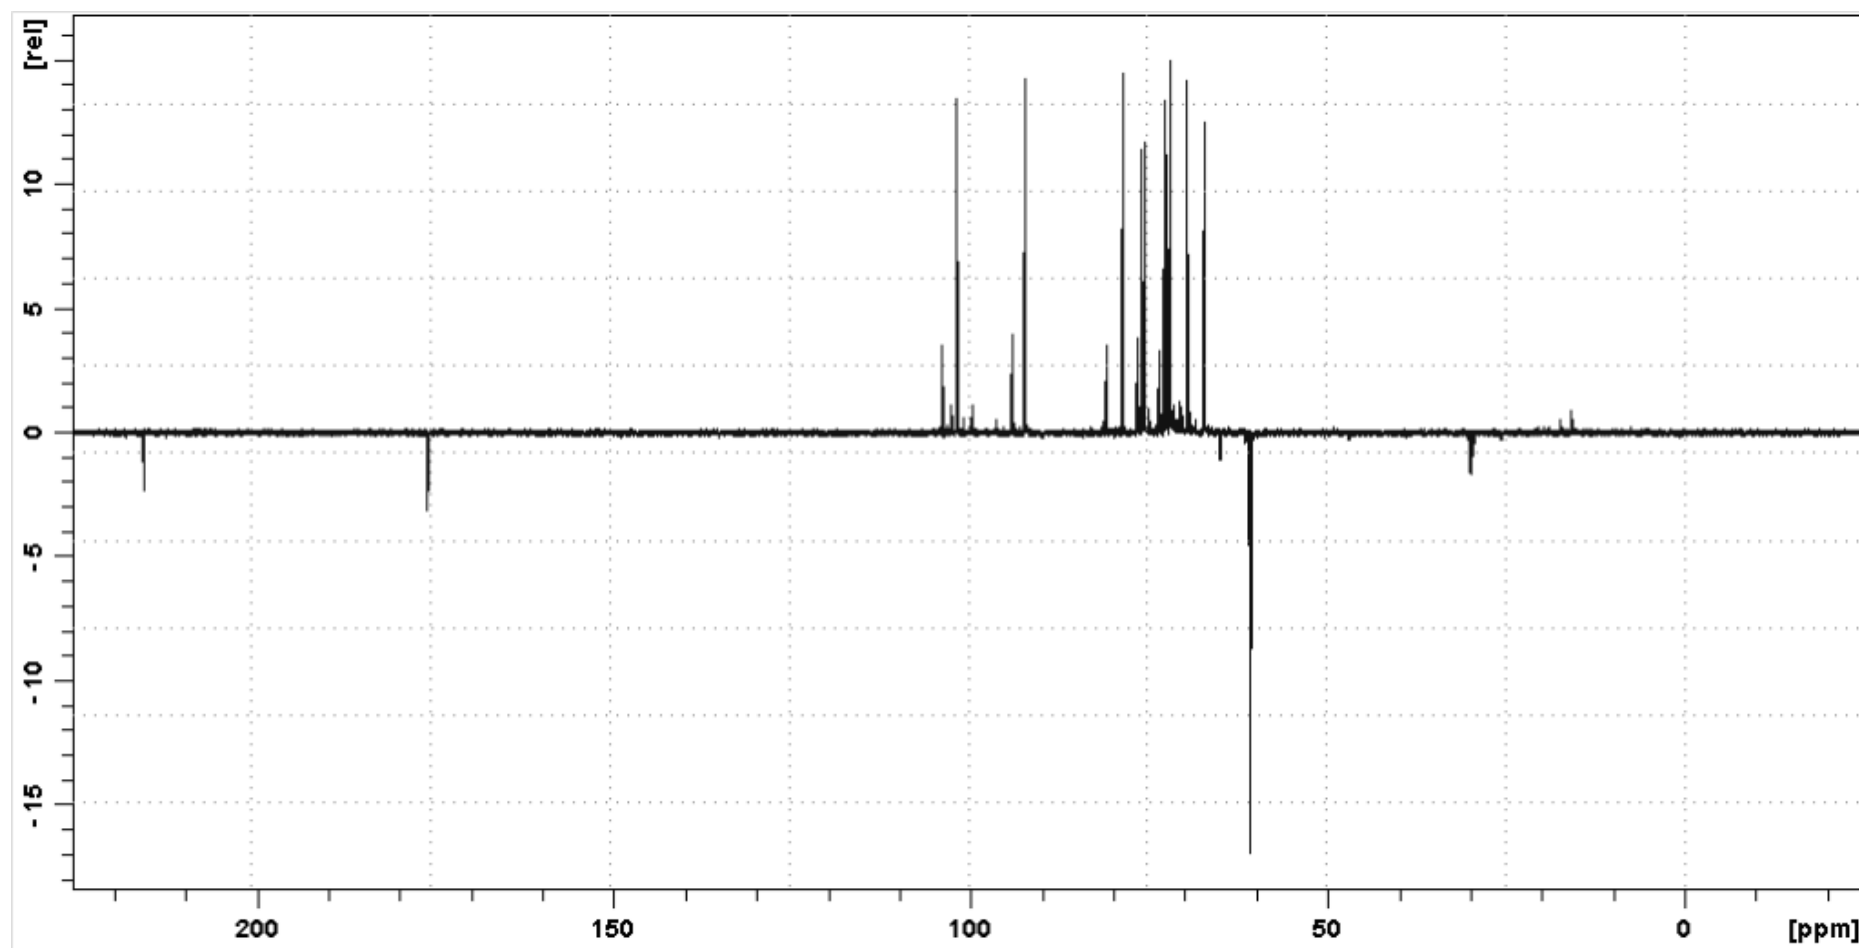

**Figure S12.**  $^1\text{H}$ -NMR of YT.

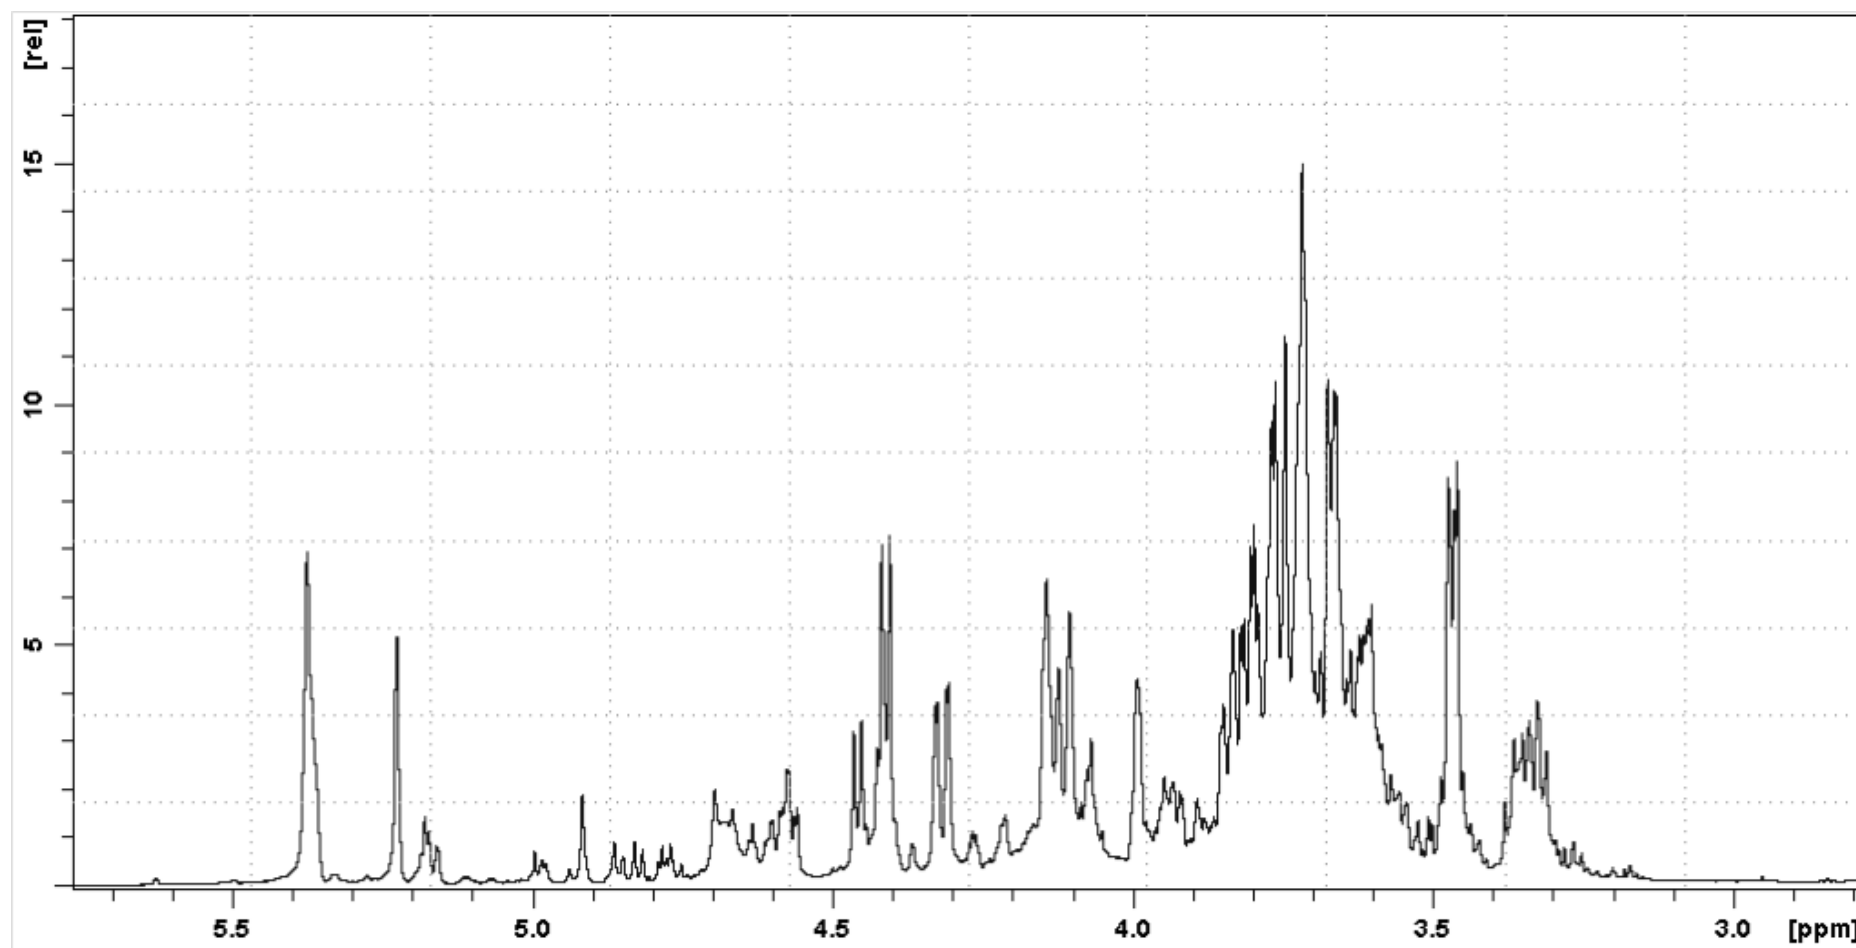

**Figure S13.** DEPTQ (C-NMR) of YT.

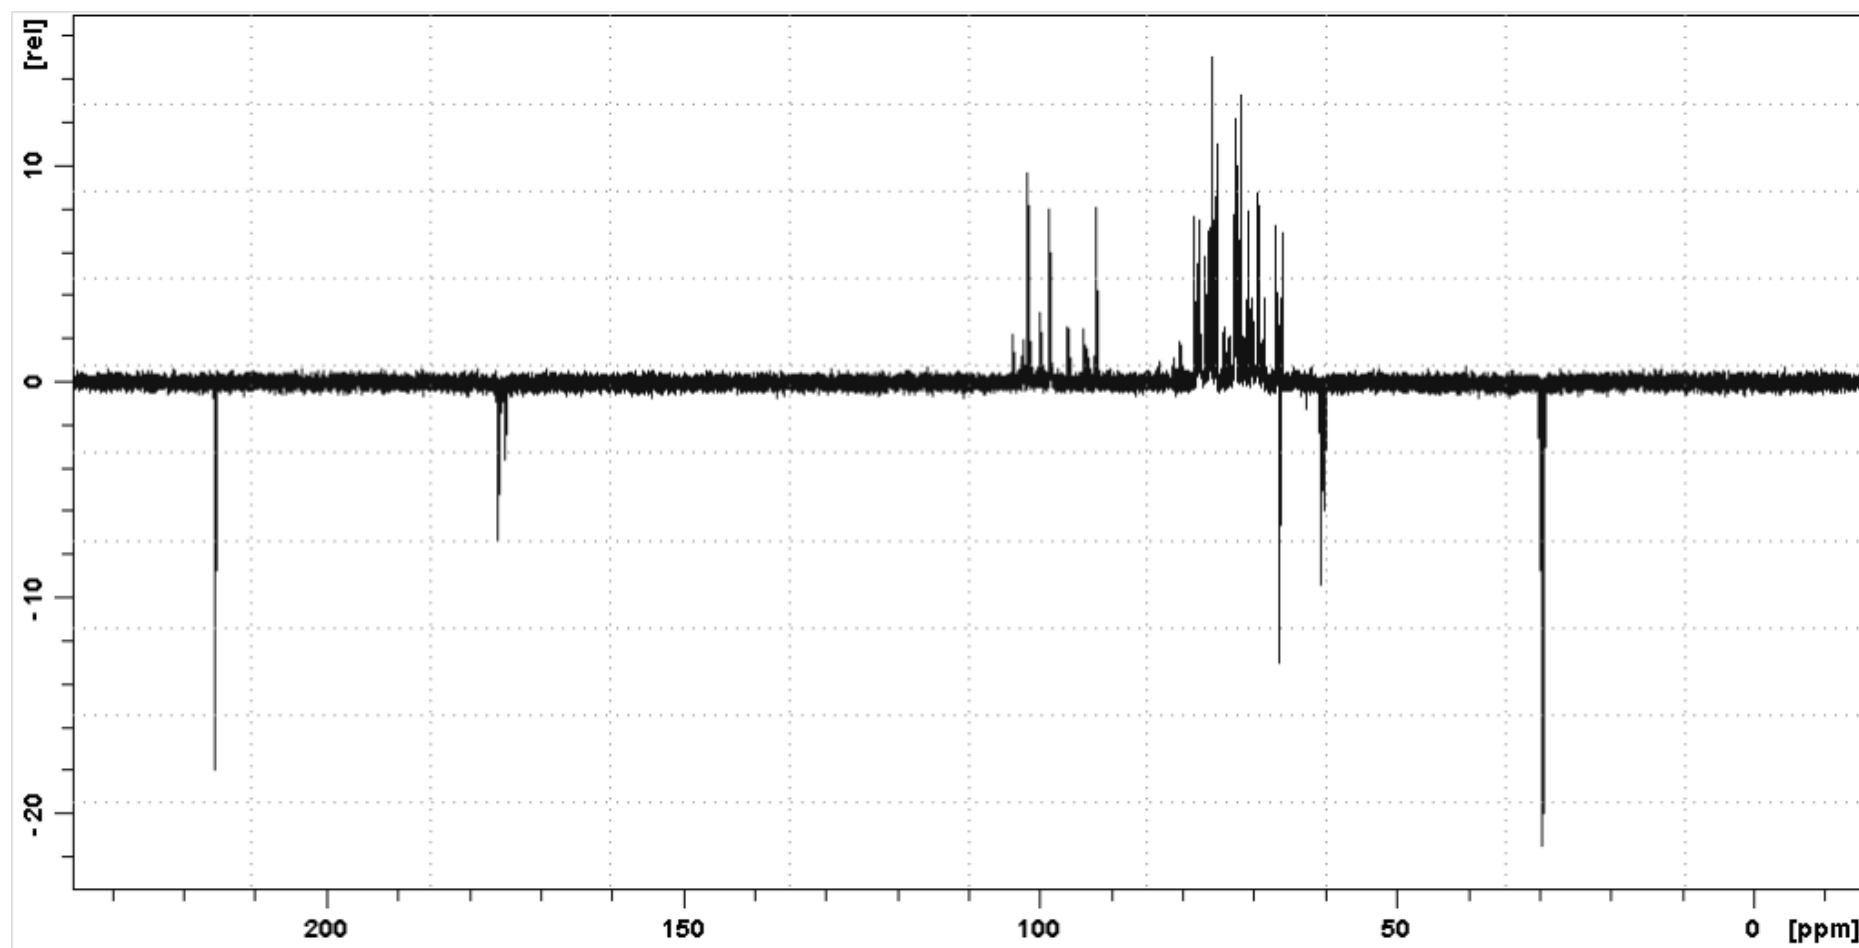

Supplement: Supplementary File 1: — PDF-Document (PDF, 473 KB) [file marinedrugs-10-02138-s001.pdf]
